# Supplementary material for: Safety and Tolerability of Lacosamide in Patients With Epilepsy: A Systematic Review and Meta-Analysis
Source: PubMed Central journal article supplement (PMC8488108; doi:10.3389/fphar.2021.694381), 2021-09-20
Supplement: DataSheet1.pdf [file DataSheet1.pdf]

**Supplementary table 1: General characteristics of included studies**

| study           | study type | Characteristics of participants                                  |                                              |      |                                                               |                                                                                                                                                                 |                                                           |                        | Interventions                                                                                                                                                                                                                                                        |                                                                                                                                                                                 | Basic safety outcome            |                                                            |                                                              |                                              |
|-----------------|------------|------------------------------------------------------------------|----------------------------------------------|------|---------------------------------------------------------------|-----------------------------------------------------------------------------------------------------------------------------------------------------------------|-----------------------------------------------------------|------------------------|----------------------------------------------------------------------------------------------------------------------------------------------------------------------------------------------------------------------------------------------------------------------|---------------------------------------------------------------------------------------------------------------------------------------------------------------------------------|---------------------------------|------------------------------------------------------------|--------------------------------------------------------------|----------------------------------------------|
|                 |            | Age(Mean±SD)<br>(year)                                           | Sample<br>(male)                             | Race | Country                                                       | Type of seizure                                                                                                                                                 | Epilepsy<br>course(y)                                     | Diagnostic<br>criteria | Treatment group                                                                                                                                                                                                                                                      | Control group                                                                                                                                                                   | Follow up<br>duration<br>(week) | Incidence of<br>treatment-e<br>mergent<br>adverse<br>event | Incidence of<br>withdrawal<br>due to<br>adverse<br>reactions | Incidence of<br>serious<br>adverse<br>events |
| Shin<br>2020    | RCT        | 43(31-55)<br>T:38.5(30-50)<br>C1:51(35-57.5)<br>C2:41.5(30.5-54) | 70(46)<br>T:22(16)<br>C1:24(15)<br>C2:24(15) | NR   | Koera                                                         | Focal-onset seizures                                                                                                                                            | 13(4-25)<br>T:11(5-21)<br>C1:12(2.75-38)<br>C2:15(5.5-23) | NR                     | LCM(initial dose:50mg/d, maximum dose:400mg/d; increased weekly by 100mg)                                                                                                                                                                                            | C1:LCM(initial dose:200mg/d, maximum dose:400mg/d; increased to maximum dose at day 8)<br>C2:LCM(initial dose:100mg/d, maximum dose:400mg/d; increased every two days by 100mg) | 0.3                             | 46%<br>T:50%<br>C1:42%<br>C2:46%                           | 44.3%                                                        | NR                                           |
| Vossler<br>2020 | RCT        | T:27.6±12.5<br>C:27.8±13.1                                       | 242<br>T:121(45)<br>C:121(55)                | NR   | North America; Latin America; Europe; the Asia-Pacific region | Primary generalised tonic-clonic seizures                                                                                                                       | T:15.4±13.0<br>C:15.5±13.1                                | ILAE, 2017             | LCM(initial dose:2mg/kg/d or 100mg/d; maximum dose:(8–12mg/kg/day for paediatric patients weighing <30kg; 6–8mg/kg/day for paediatric patients weighing ≥30kg to <50kg; 300–400mg/day for adults and paediatric patients weighing ≥50kg; gradually increased weekly) | Placebo                                                                                                                                                                         | 6                               | T:46.3%<br>C:34.7%                                         | T:9.1%<br>C:5.1%                                             | T:6.6%<br>C:3.3%                             |
| Schmitz<br>2019 | RCT        | 48.0±16.8<br>T:47.6±17.3<br>C:48.4±16.4                          | 126(54)<br>T:64(30)<br>C:62(24)              | NR   | Europe; North America; the Asia Pacific                       | Simple focal:42(33.3%);<br>Complex partial:58(46.0%);<br>Partial evolving to secondarily generalized:57(45.2%);<br>Myoclonic:1(0.8%);<br>Tonic-clonic:14(11.1%) | 26.0(16.0-45.0)<br>T:25.0(16.5-38.5)<br>C:28.0(16.0-52.0) | ILAE                   | LCM(initial dose:100mg/d; maximum dose:400-600mg/d; gradually increase 100mg/d a week)                                                                                                                                                                               | CBZ-CR(initial dose:200mg/d; maximum dose:800-1200mg/d; gradually increase 200mg/d a week)                                                                                      | 6                               | T:45.3%<br>C:61.3%                                         | T:10.9%<br>C:24.2%                                           | T:12.5%<br>C:3%                              |

|            |     |                                                                                        |                                                     |       |              |                                                                                                                                                                                                                                                                                                                                                                                                                                                                                                                                                                                                            | %)                                                               |      |                                                                                                                                                    |                                                                                                        |            |                                    |                                  |                              |  |  |  |
|------------|-----|----------------------------------------------------------------------------------------|-----------------------------------------------------|-------|--------------|------------------------------------------------------------------------------------------------------------------------------------------------------------------------------------------------------------------------------------------------------------------------------------------------------------------------------------------------------------------------------------------------------------------------------------------------------------------------------------------------------------------------------------------------------------------------------------------------------------|------------------------------------------------------------------|------|----------------------------------------------------------------------------------------------------------------------------------------------------|--------------------------------------------------------------------------------------------------------|------------|------------------------------------|----------------------------------|------------------------------|--|--|--|
| Huang 2018 | RCT | 40.8 ±12.9(18-65)<br>T1:40.2± 14.4<br>T2:43.9 ± 12.4<br>T3:38.4 ± 11.6                 | 71<br>T1:23<br>T2:24<br>T3:24                       | NR    | Canada       | Refractory Focal Epilepsy                                                                                                                                                                                                                                                                                                                                                                                                                                                                                                                                                                                  | 21.7 ± 16.0<br>T1:24.9 ± 18.2<br>T2:20.2 ± 15.8<br>T3:20.2 ±14.1 | NR   | T1:LCM(100mg,iv>30 min)<br>T2:LCM(200mg,iv>30 min)<br>T3:LCM(400mg,iv>30 min)                                                                      | /                                                                                                      | /          | T1:8.7%<br>T2:12.5%<br>T3:29.1%    | 0                                | 0                            |  |  |  |
| Hong 2016  | RCT | 32.3±11.9(16-70)<br>T1:33.2±12.2(16-70 )<br>T2:32.3±11.9(16-70 )<br>C:31.8±12.0(16-70) | 547(300)<br>T1:183(94)<br>T2:181(104)<br>C:184(102) | Asian | China; Japan | Simple partial:185(34.0%)<br>Complex partial impaired consciousness at onset:367(67.5%)<br>Complex partial with simple partial onset:158(29.0%)<br>Secondarily generalized:350(64.3%)<br>T1:Single partial:36(20.93%);<br>Complex partial:102(59.3%);<br>Generalized:8(4.65%)<br>T2:Single partial:38(21.84%);<br>Complex partial:104(59.77%);<br>Generalized:5(2.87%)<br>C:Single partial:33(19.53%);C omplex partial:105(62.13%);<br>Generalized:7(4.14%)<br>T:Partial-onset seizures:8; Complex partial seizures:12;<br>Tonic clonic seizures:8; Tonic seizures:2; Clonic seizures:3<br>C:Partial-onset | 17.7±11.4<br>T1:18.3±10.9<br>T2:17.9±11.7<br>C:16.8±11.5         | ILAE | T1:LCM(initial dose:100mg/d; maximum dose:200mg/d; gradually increased)<br>T2:LCM(initial dose:100mg/d; maximum dose:400mg/d; gradually increased) | Placebo                                                                                                | 4          | T1:65.0%<br>T2:79.4%<br>C:69.6%    | T1:4.4%<br>T2:15.6%<br>C:7.6%    | T1:1.1%<br>T2:5.0%<br>C:1.6% |  |  |  |
| Wu 2015    | RCT | T1:29.61±12.74(12.7-69.8)<br>T2:30.50±11.18(13.2-65.7)<br>C:30.54±12.04(14.6-65.8)     | 515<br>T1:172(97)<br>T2:174(93)<br>C:169(90)        | NR    | China        | T1:Single partial:36(20.93%);<br>Complex partial:102(59.3%);<br>Generalized:8(4.65%)<br>T2:Single partial:38(21.84%);<br>Complex partial:104(59.77%);<br>Generalized:5(2.87%)<br>C:Single partial:33(19.53%);C omplex partial:105(62.13%);<br>Generalized:7(4.14%)<br>T:Partial-onset seizures:8; Complex partial seizures:12;<br>Tonic clonic seizures:8; Tonic seizures:2; Clonic seizures:3<br>C:Partial-onset                                                                                                                                                                                          | T1:13.30±8.43<br>T2:14.42±10.06<br>C:13.23±9.21                  | ILAE | T1:LCM(initial dose:0mg; maximum dose:200mg/d; gradually increased)<br>T2:LCM(initial dose:100mg/d; maximum dose:400mg/d; gradually increased)     | Placebo                                                                                                | 4.5        | T1:25.84%<br>T2:36.11%<br>C:19.55% | T1:4.47%<br>T2:6.63%<br>T3:3.33% | T1:0<br>T2:1.2%<br>C:1.2%    |  |  |  |
| Yang 2015* | RCT | T:11.12±3.18(7-13)<br>C:11.1±3.21(7-14)                                                | 60<br>T:30(15)<br>C:30(17)                          | Asian | China        | T:Partial-onset seizures:8; Complex partial seizures:12;<br>Tonic clonic seizures:8; Tonic seizures:2; Clonic seizures:3<br>C:Partial-onset                                                                                                                                                                                                                                                                                                                                                                                                                                                                | T:4.51±3.11<br>C:4.70±3.24                                       | NR   | LCM(initial dose:100mg/d; maximum dose:200mg/d; gradually increase 100mg/d a week)                                                                 | TPM(Initial dose:0.5-1.0mg/kg/d ;<br>Maximum dose: 4mg/kg/d; gradually increase 0.5-1.0mg/kg/d a week) | 16(1.5-48) | T:25.0%<br>C:33.3%                 | 0                                | 0                            |  |  |  |

|                    |     |                                                                                                          |                                                           |                                     |                     |                                                                                                                                                                                                      |                                                                     |            |                                                                                                                                                                                                                               |                                                                     |      |                                     |                                            |                                 |
|--------------------|-----|----------------------------------------------------------------------------------------------------------|-----------------------------------------------------------|-------------------------------------|---------------------|------------------------------------------------------------------------------------------------------------------------------------------------------------------------------------------------------|---------------------------------------------------------------------|------------|-------------------------------------------------------------------------------------------------------------------------------------------------------------------------------------------------------------------------------|---------------------------------------------------------------------|------|-------------------------------------|--------------------------------------------|---------------------------------|
| Wechsler 2014      | RCT | 40.6±13.0(16-69)<br>T:41.4±14.3(16-69)<br>C:40.4±12.5(17-69)                                             | 425(206)<br>T:319(150)<br>C:106(56)                       | Black;<br>White;<br>Other           | US; other countries | seizures:9; Complex partial seizures:10; Tonic clonic seizures:9; Tonic seizures:3; Clonic seizures:2<br>Simple partial:201(47.3%)<br>Complex partial:363(85.4%)<br>Secondary generalized:287(67.5%) | 17.2±14.0<br>T:16.9 ±13.5<br>C: 18.0±15.3                           | ILAE       | LCM(initial dose:200mg/d;maximum dose:400mg/d; gradually increased)                                                                                                                                                           | LCM(Initial dose:200mg/d;maximum dose:300mg/d; gradually increased) | 4.75 | 84.5%<br>T:85.3%<br>C:84.5%         | 16.2%<br>T:16.9%<br>C:14.2%                | 4.0%<br>T:5.3%<br>C:0           |
| Chung 2010         | RCT | 38.3±12.13(16.0-61.0)<br>T1:39.1±12.37(17.0-71.0)<br>T2:36.8±11.76(16.0-69.0)<br>C:38.1±11.96(16.0-61.0) | 405<br>T1:204(104)<br>T2:97(47)<br>C:104(49)              | White;<br>Black;<br>Asian;<br>Other | US                  | Focal-onset seizures                                                                                                                                                                                 | NR                                                                  | ILAE       | T1:LCM(initial dose:100mg/d; maximum dose:400mg/d; gradually increased)<br>T2:LCM(initial dose:100mg/d; maximum dose:600mg/d; gradually increased)                                                                            | Placebo                                                             | 4.5  | NR                                  | T1:5%<br>T2:18%<br>C:27%                   | T1:5.90%<br>T2:3.10%<br>C:2.90% |
| Halasz 2009        | RCT | 37.8±11.88(16-70)<br>T1:37.9±12.96(16-66)<br>T2:38.5±10.93(16-70)<br>C:36.9±11.70(17-63)                 | 485<br>T1:163(90)<br>T2:159(69)<br>C:163(91)              | Caucasian; Black; Asian             | US                  | Simple partial-onset seizures:67(41.1%);<br>Complex partial-onset seizures:142(87.1%);<br>Partial-onset seizures with secondary generalization:125(76.7%)                                            | 22.3±12.56<br>T1:22.9 ±12.30<br>T2:22.8 ±13.15<br>C:21.1 ±12.23     | ILAE, 1981 | T1:LCM(initial dose:0mg; maximum dose:200mg/d; gradually increased)<br>T2:LCM(initial dose:100mg/d; maximum dose:400mg/d; gradually increased)                                                                                | Placebo(100mg/d)                                                    | 4    | NR                                  | 8.6%<br>T1:6.1%<br>T2:15.1%<br>C:4.9%      | T1:8%<br>T2:9.4%<br>C:3.7%      |
| Ben-Me nachem 2007 | RCT | T1:39.9±11.71(18-65)<br>T2:41.2±11.61(18-68)<br>T3:39.4±10.53(18-64)<br>C:38.9±11.11(19-66)              | 418<br>T1:107(46)<br>T2:108(53)<br>T3:106(45)<br>C:97(47) | Caucasian; Black; Asian; Other      | US                  | Focal-onset seizures                                                                                                                                                                                 | T1:25.1 ±12.89<br>T2:24.7 ±13.08<br>T3:23.6 ±12.74<br>C:24.6 ±11.77 | ILAE       | T1:LCM(initial dose:100mg/d; maximum dose:200mg/d; gradually increased)<br>T2:LCM(initial dose:100mg/d; maximum dose:400mg/d; gradually increased)<br>T3:LCM(initial dose:100mg/d; maximum dose:600mg/d; gradually increased) | Placebo(100mg/d)                                                    | 4.5  | T1:79%<br>T2:81%<br>T3:92%<br>C:70% | T1:11.2%<br>T2:18.5%<br>T3:30.2%<br>C:5.2% | T1:9%<br>T2:6%<br>T3:3%<br>C:5% |

|                 |                            |                                           |                        |                            |           |                                                                                                    |                            |      |                                                                                                                                                                        |                                       |                                   |                               |       |    |
|-----------------|----------------------------|-------------------------------------------|------------------------|----------------------------|-----------|----------------------------------------------------------------------------------------------------|----------------------------|------|------------------------------------------------------------------------------------------------------------------------------------------------------------------------|---------------------------------------|-----------------------------------|-------------------------------|-------|----|
| Liu 2020        | Prospective cohort study   | T:55.42±4.98<br>C:56.13±5.68              | T:120(64)<br>C:132(69) | Asian                      | China     | Refractory partial seizures                                                                        | T:8.01±3.31<br>C:8.57±3.17 | NR   | LCM(initial dose:100mg/d, maximum dose:200-400mg/d; increased weekly by 100mg)<br>LEV(initial dose:500mg/d, maximum dose:1000mg/d; increased every two weeks by 500mg) | 6                                     | T:25.83%<br>C:20.4%               | NR                            | NR    |    |
| Del Bianco 2019 | Retrospective cohort study | T:76.23±7.5(66-88)<br>C:73.58±6.39(65-88) | T:22(10)<br>C:24(10)   | NR                         | NR        | Focal-onset seizures                                                                               | T:4.23±8.53<br>C:2.29±6.11 | NR   | LCM(mean dose:204.51±88.51mg/d)                                                                                                                                        | 12                                    | LEV(Mean dose:1281.25±378.15mg/d) | T:2/22(9.1%)<br>C:3/24(12.5%) | NR    | NR |
| Ferreira 2019*  | Prospective cohort study   | 7.0±5.1(≥1 month to ≤17)                  | 47(23)                 | White; Black; Asian; Other | US        | Focal-onset seizures                                                                               | 4.3±3.7                    | ILAE | LCM(initials dose: 2 mg/kg/d; maximum dose:8m-12mg/kg/d; increase the dose by 2 mg/kg/d per week)                                                                      | /                                     | 3.3                               | 87.5%                         | 42.6% | NR |
| Dogan 2018      | Retrospective cohort study | 34±14.5 (16-79)                           | 136(70)                | NR                         | Turkey    | Focal-onset seizures                                                                               | 14.3                       | ILAE | LCM(mean dose:323.5±66.9mg/d)                                                                                                                                          | /                                     | 15.3±11.7                         | 28.7%                         | 16.2% | NR |
| Maloney 2018    | Retrospective cohort study | T:39<br>C:38                              | T:23(9)<br>C:7(4)      | NR<br>NR                   | Ireland   | Focal epilepsy:36; Generalised epilepsy:4; Genetic generalised epilepsy:1; Unclassified epilepsy:4 | 1                          | ILAE | LCM(mean dose:300mg/d, LCM monotherapy)                                                                                                                                | LCM:(300mg/d, Failed LCM monotherapy) | 12                                | 10.0%                         | 6.6%  | 0  |
| Neal 2018       | Ambispective cohort study  | NR                                        | 310(142)               | NR                         | Australia | Focal-onset seizures                                                                               | 21.3±14.0                  | ILAE | LCM(initial dose:50-100mg/d; maximum dose:200mg/d; increased 50-100md a week)                                                                                          | /                                     | 12                                | 44.5%                         | 11.2% | NR |

|                 |                            |                                          |                       |                                                |                                                                                                                    |                                                                                                                                                                                               |                          |      |                                                                                                                                           |                                                                                                                                           |                            |                             |                          |                 |
|-----------------|----------------------------|------------------------------------------|-----------------------|------------------------------------------------|--------------------------------------------------------------------------------------------------------------------|-----------------------------------------------------------------------------------------------------------------------------------------------------------------------------------------------|--------------------------|------|-------------------------------------------------------------------------------------------------------------------------------------------|-------------------------------------------------------------------------------------------------------------------------------------------|----------------------------|-----------------------------|--------------------------|-----------------|
| Villanueva 2018 | Retrospective cohort study | T:<65<br>C:≥65                           | 439<br>T:311<br>C:128 | NR                                             | Spain                                                                                                              | Focal-onset seizures                                                                                                                                                                          | ≥16                      | ILAE | LCM(Median dose in first-line monotherapy: 200mg/d (50-400mg/d); Median dose in conversion to monotherapy patients: 300mg/d (50-600mg/d)) | LCM(Median dose in first-line monotherapy: 200mg/d (50-400mg/d); Median dose in conversion to monotherapy patients: 300mg/d (50-600mg/d)) | 12±3                       | 11.8%<br>T:10.0%<br>C:16.4% | 1.4%<br>T:1.3%<br>C:1.6% | 0<br>T:0<br>C:0 |
| Sarkis 2017     | Retrospective cohort study | T:>60<br>C:>60                           | T:71(26)<br>C:39(13)  | Caucasia;<br>Other                             | US                                                                                                                 | T:Focal epilepsy:94%,<br>Medically refractory:49%;<br>Generalized tonic clonic seizures:43.4%<br>C:Focal epilepsy:85%;<br>Medically refractory:46%;<br>Generalized tonic clonic seizures43.6% | T:14.6±19.5<br>C:24±21.4 | NR   | LCM(initial dose:100mg/d; maximum dose:200mg/d; gradually increased)                                                                      | ZNS(Initial dose:100mg/d; maximum dose:200mg/d; gradually increased)                                                                      | T:23.1±21.2<br>C:46.3±38.3 | T:38%<br>C:51%              | T:27%<br>C:28%           | NR              |
| Kurth 2016      | Retrospective cohort study | T:43.4±12.1(19-70)<br>C:38.9±14.1(15-71) | T:70(36)<br>C:70(29)  | NR                                             | Germany                                                                                                            | Refractory Status Epilepticus                                                                                                                                                                 | T:28.5<br>C:24           | NR   | LCM(Mean dose:374.5mg/d(150-600mg/d)                                                                                                      | PER(Mean dose:8.6mg/d(4-14mg/d)                                                                                                           | 3–6                        | T:45.7%<br>C:72.9%          | NR                       | NR              |
| McGinnis 2016   | Retrospective cohort study | <21                                      | 223(119)              | White;<br>Black;<br>Asian;<br>Other or unknown | US                                                                                                                 | Focal:168;<br>Generalized:12;<br>Both focal and generalized:43                                                                                                                                | NR                       | ILAE | LCM(mean maximum dose:6.6(1.4-25.1)mg/kg/day)                                                                                             | /                                                                                                                                         | 7.4(1-53)                  | 42%                         | 21.5%                    | NR              |
| Giraldez 2015   | Retrospective cohort study | 49.4(16-92)                              | 66(29)                | NR                                             | Spain                                                                                                              | Focal-onset seizures                                                                                                                                                                          | 6.5±9.9                  | NR   | LCM(mean dose:270.8mg/d,qd)                                                                                                               | /                                                                                                                                         | 0.5–54                     | 22.70%                      | 1.52%                    | 0               |
| Zadeh 2015      | Prospective cohort study   | NR                                       | 456(233)              | NR                                             | Austria;<br>Bulgaria;<br>Czech Republic;<br>DenmarkFinland;<br>France;<br>Greece,<br>Italy;<br>Romania;<br>Russia, | Simple partial;<br>Complex partial;<br>Generalised seizures                                                                                                                                   | NR                       | ILAE | LCM(initial dose:100mg/d; maximum dose 400mg/d; increased by 100 mg/day/week)                                                             | /                                                                                                                                         | NR                         | 72.8%                       | 2.3%                     | 5.5%            |

| Author (Year)   | Study Design               | Age (years)                                                                 | n                                                                  | Ethnicity           | Country          | Seizure Type                                                                 | Age at Onset (years)                                          | ILAE       | Initial Treatment                                                                              | Response Rate (%) | Seizure-Free Rate (%)                                   | Other Outcomes          |     |
|-----------------|----------------------------|-----------------------------------------------------------------------------|--------------------------------------------------------------------|---------------------|------------------|------------------------------------------------------------------------------|---------------------------------------------------------------|------------|------------------------------------------------------------------------------------------------|-------------------|---------------------------------------------------------|-------------------------|-----|
| Brodie 2014     | Prospective cohort study   | T:42(14-74)<br>C1:42(18-75)<br>C2:40(16-78)<br>C3:42(15-80)<br>C4:44(18-76) | T:160(74)<br>C1: 136(65)<br>C2:141(63)<br>C3:135(73)<br>C4:160(74) | NR                  | UK               | Focal-onset seizures                                                         | NR                                                            | ILAE       | LCM(initial dose:50mg/d; maximum dose:200-400mg/d; gradually increased)                        | NR                | T:22.5%<br>C1:31.1%<br>C2:32.4%<br>C3:41.8%<br>C4:50.4% | NR                      | 0   |
| Verrotti 2013*  | Prospective cohort study   | T:10.8±3.14 (4-15)<br>C:21.0±5.62(16-38)                                    | T:59(30)<br>C:59(34)                                               | NR                  | Italian; Germany | Generalize; Focal; Mixed                                                     | NR                                                            | ILAE       | LCM(initial dose:1mg/kg/d; maximum dose:3-12mg/d; gradually increased)                         | 12                | T:30.5%<br>C:28.8%                                      | T:3.4%<br>C:8.5%        | NR  |
| Fountain 2012   | Prospective cohort study   | 39.0±11.66<br>T1:39.1±11.77<br>T2:38.6±11.53<br>T3:39.6±12.24               | 100(51)<br>T1:25(11)<br>T2:50(24)<br>T3:25(16)                     | White; Black; Other | US               | Simple partial; Complex partial seizures with or without secondary general   | 23.2±13.97<br>T1:20.0±12.16<br>T2:23.0±13.54<br>T3:26.8±16.08 | NR         | T1:LCM(200mg/d,iv)<br>T2:LCM(300mg/d,iv)<br>T3:LCM(400mg/d,iv)                                 | NR                | 79%                                                     | T1:0<br>T2:6%<br>T3:16% | <5% |
| Villanueva 2012 | Retrospective cohort study | 42.1±15.3(12-83)                                                            | 158(82)                                                            | NR                  | Spain            | Focal-onset seizures                                                         | 23.5±15.3                                                     | ILAE, 1981 | LCM(initial dose:100-200mg/d; maximum dose:400mg/d; increases of 50 mg qd or 50 mg bid weekly) | 12                | 49.4%                                                   | 19%                     | 0   |
| Zhao 2021*      | Case series                | 7.2±3.9                                                                     | 72(44)                                                             | Asian               | China            | Generalized seizure:27(30%); Focal seizure:25(35%); Complex seizures:20(28%) | 3.1±2.7                                                       | ILAE,2017  | LCM(maintenance dose:6.8mg/kg/d (1.6-20mg/kg/d))                                               | 12                | 30.5%                                                   | 1.4%                    | 0   |

|                |             |                  |          |    |                                                           |                                                                                                                                                                                                                                                                                                                                                                                                       |            |      |                                                                                                |   |            |       |       |      |
|----------------|-------------|------------------|----------|----|-----------------------------------------------------------|-------------------------------------------------------------------------------------------------------------------------------------------------------------------------------------------------------------------------------------------------------------------------------------------------------------------------------------------------------------------------------------------------------|------------|------|------------------------------------------------------------------------------------------------|---|------------|-------|-------|------|
| Ghassan 2020*  | Case series | 10(2-18)         | 58(41)   | NR | Lebanon                                                   | Focal-onset seizures                                                                                                                                                                                                                                                                                                                                                                                  | NR         | NR   | LCM(initial dose: 2mg/kg/d; maximum dose:10mg/kg/d; weekly increments of 2mg/kg/d)             | / | 24         | 29.3% | 3.4%  | NR   |
| Ruda 2020      | Case series | 44.5±14.7(16-83) | 93(50)   | NR | Italy; France; United Kingdom; German; Netherlands; Spain | Focal-onset seizures                                                                                                                                                                                                                                                                                                                                                                                  | NR         | NR   | LCM(mean dose: 220.7±94.9mg/d)                                                                 | / | 6          | 16.1% | 5.4%  | 1.1% |
| Kleist 2019    | Case series | 36.2±12.9(18-63) | 80(51)   | NR | Germany                                                   | Refractory focal or generalised epilepsy                                                                                                                                                                                                                                                                                                                                                              | 27.9(3-59) | ILAE | LCM(initial dose:50-100mg/day; mean maximum dose: 344.7mg/day(100-700mg/day))                  | / | 21-24      | 37.5% | 14.0% | NR   |
| Ruegger 2019*  | Case series | <16              | 107(61)  | NR | Australia                                                 | Focal:57(53%); Generalised:50(47%)                                                                                                                                                                                                                                                                                                                                                                    | NR         | NR   | NR                                                                                             | / | 12         | 13.1% | 6.7%  | NR   |
| Baker 2018     | Case series | 41±12.8(16-82.5) | 165(101) | NR | US                                                        | Focal epilepsy:146(88.4%); Idiopathic generalized epilepsy:13(7.9%); Symptomatic (structural); Generalized epilepsy:4(2.4%); Classified seizures:2(1.3%)<br>Tonic:92(48.2%); Complex partial:83(43.5%); Simple partial:66(34.6%); Tonic-clonic, generalized:26(13.6%); Epileptic spasms:25(13.1%); Partial secondarily generalized:22(11.5%); Myoclonic:18(9.4%); Hypomotor:5(2.6%); Gelastic:2(1.0%) | 27.6       | NR   | LCM(maintenance dose:<200mg:54(32.7%);200-300mg:16(9.7%); 300-400mg:48(29.%),>400mg:47(28.4%)) | / | 31.2(3-54) | 42.4% | 27.8% | NR   |
| Francisc 2018* | Case series | <18              | 191(104) | NR | Spain                                                     | Partial secondarily generalized:22(11.5%); Myoclonic:18(9.4%); Hypomotor:5(2.6%); Gelastic:2(1.0%)                                                                                                                                                                                                                                                                                                    | 5.4±3.7    | NR   | LCM(mean dose:6.7mg/kg/d(1.3-13.0mg/kg/d))                                                     | / | 12         | 28.8% | 3.7%  | NR   |

| Author               | Study Design | Age (years)        | n            | Sex | Country   | Seizure Type                                                                   | Duration (months) | Classification | LCM (initial dose)                                                                                     | LCM (maximum dose)                                                                                         | LCM (mean dose) | Response Rate (%) | Adverse Effects (%) | Discontinuation (%) |
|----------------------|--------------|--------------------|--------------|-----|-----------|--------------------------------------------------------------------------------|-------------------|----------------|--------------------------------------------------------------------------------------------------------|------------------------------------------------------------------------------------------------------------|-----------------|-------------------|---------------------|---------------------|
| Maher 2018           | Case series  | 30.9(12-65)        | 104(47)      | NR  | Lebanon   | Focal partial-onset seizures                                                   | NR                | NR             | LCM(initial dose:200mg/d; maximum dose:600mg/d; gradually increased)                                   | /                                                                                                          | 13.6(2-34)      | 31.7%             | 2.0%                | 0                   |
| Munoz-Lopetegui 2018 | Case series  | 50.3(15-88)        | 73(36)       | NR  | Spain     | Focal seizure:40(54.8%)                                                        | 3 (0-65)          | ILAE           | LCM(mean dose:211.4mg/d(100-400mg/d))                                                                  | /                                                                                                          | 12              | 20.5%             | 11.1%               | NR                  |
| Ngampoopun 2018*     | Case series  | 11(7-16)           | 11           | NR  | Tailand   | Nonconvulsive Status Epilepticus:2(18.2%) ; Acute repetitive seizures:9(81.8%) | 0.25              | NR             | LCM(initial dose: 10mg/kg/d; maximum dose:400mg/d; gradually increased))                               | /                                                                                                          | 0.25            | 9.1%              | 0                   | NR                  |
| Rosati 2018*         | Case series  | 10.6±4.8           | 88(47)       | NR  | Italy     | Focal:57(64.8%); Generalized:5(9.3%) ; Combined:13(24.1%)                      | 6.8±4.6           | ILAE           | LCM(initial dose:2-3mg/kg/d; maximum dose:5-10mg/kg/d; gradually increase every week)                  | /                                                                                                          | 72              | 12.5%             | NR                  | NR                  |
| Rudà 2018            | Case series  | 48.6±14.9          | 71(48)       | NR  | Italy     | Gliomas and uncontrolled seizures                                              | NR                | NR             | LCM(initial dose:100mg/day; maximum dose:400mg/day; increase 50mg per week)                            | /                                                                                                          | 9               | 12.7%             | NR                  | NR                  |
| Samara sekera 2018   | Case series  | 21-54              | 8(5)         | NR  | Australia | Refractory sleep-related hypermotor epilepsy                                   | NR                | NR             | LCM(mean dose:400mg/d(300-600 mg/d))                                                                   | /                                                                                                          | 21.5            | 50.0%             | NR                  | NR                  |
| Toledo 2018          | Case series  | T:19-56<br>C:27-81 | T:16<br>C:32 | NR  | Spain     | Cancer-related seizures                                                        | NR                | NR             | LCM(Initial dose:200mg/day(100-400mg/day); maximum dose:400mg/day(200-600mg/day); gradually increased) | LCM(Initial dose:200mg/day(100-600mg/day); Maintenance dose:300mg/day(100-800mg/day); gradually increased) | 30.5            | 75.0%             | NR                  | 0                   |



|                |             |                  |          |                                                                  |             |                                                                                                                                                                                                                                                                                                  |             |      |                                                                          |   |                  |       |       |      |
|----------------|-------------|------------------|----------|------------------------------------------------------------------|-------------|--------------------------------------------------------------------------------------------------------------------------------------------------------------------------------------------------------------------------------------------------------------------------------------------------|-------------|------|--------------------------------------------------------------------------|---|------------------|-------|-------|------|
| Baulac 2017    | Case series | 39.7±12.6        | 120(46)  | American Indian/Alaskan Native; Asian; Black; White; Other/mixed | Australia   | Focal seizures:120(100%); Simple focal with motor symptoms:42(35.0%); Simple focal with somatosensory symptoms:12(10.0%); Simple focal with autonomic symptoms:5(4.2%); Simple focal with psychic symptoms:7(5.8%); Complex focal:90(75.0%); Focal evolving to secondarily generalized:82(68.3%) | 19.89±15.60 | NR   | LCM(initial dose:100mg/d; maximum dose:200-600mg/d; gradually increased) | / | 5.25             | 75.0% | 6.7%  | 3.0% |
| Bottcher 2017  | Case series | 32.7±14.4(2-66)  | 136(74)  | NR                                                               | Germany     | Focal-onset seizures:96%                                                                                                                                                                                                                                                                         | 26.6±15.1   | ILAE | LCM(mean ±SD dose:411.0±119.1mg(100-800mg/d))                            | / | 6                | 11.0% | 11.0% | NR   |
| Brenner 2017   | Case series | 41.7±15.0(18-78) | 132(75)  | NR                                                               | Netherlands | Focal onset:4(3%); (Multi)focal onset with secondary generalization:77 (58.3%)<br>Generalized onset:31(23.5%)<br>Unknown:20(15.2%)                                                                                                                                                               | NR          | ILAE | LCM(mean ±SD dose:243.7±104.9mg/d; 50.0-450.0mg/d)                       | / | 4.6±2.1(0.1-7.7) | 62.9% | 10.6% | NR   |
| Rinesalio 2017 | Case series | 68(61-84)        | 67(37)   | NR                                                               | Finland     | NR                                                                                                                                                                                                                                                                                               | 8.8(0.9-60) | NR   | LCM(mean dose:368 mg/d(100-600mg/d))                                     | / | 16(1.5-48)       | 33.9% | 5.6%  | 0    |
| Sanchez 2017   | Case series | 54.1±13.8        | 39(36)   | NR                                                               | Spain       | Secondary epileptic seizures                                                                                                                                                                                                                                                                     | NR          | NR   | LCM(mean dose:138.5±68.3 mg/d)                                           | / | 6                | 12.0% | 4.0%  | 0    |
| Svendsen 2017  | Case series | 39(4-86)         | 344(165) | NR                                                               | Norway      | SE,ARSs                                                                                                                                                                                                                                                                                          | NR          | NR   | LCM(mean dose:299mg/d)                                                   | / | NR               | 44.1% | 7.0%  | 0    |

|               |             |                    |          |              |                               |                                                                              |             |      |                                                                                                                                                                                                 |   |            |       |      |    |
|---------------|-------------|--------------------|----------|--------------|-------------------------------|------------------------------------------------------------------------------|-------------|------|-------------------------------------------------------------------------------------------------------------------------------------------------------------------------------------------------|---|------------|-------|------|----|
| Arkilo 2016*  | Case series | 6.5(0.6-12)        | 47       | NR           | US                            | Rpilepsia partialis continua; Status epilepticus; Acute seizure exacerbation | NR          | NR   | Epilepsia partialis continua:LCM(5-10mg/kg)<br>Status epilepticus:LCM(median dose 7.2mg/kg, range 4-11mg/kg)<br>Acute exacerbation of seizure frequency (median dose 4.5mg/kg, range 1-11mg/kg) | / | NR         | 13.5% | NR   | 0  |
| Borzi 2016    | Case series | 42.7±12.11 (20-71) | 86(36)   | NR           | Italy,Germ any                | Temporal lobe epilepsy                                                       | NR          | ILAE | LCM:initial dose:50mg/day, maximum dose:200-400mg/day, increased by every 50mg weekly                                                                                                           | / | 18(6-46)   | 3.5%  | NR   | NR |
| Miskin 2016   | Case series | 11.9(4-19.5)       | 21(10)   | NR           | US                            | Refractory generalized epilepsy                                              | NR          | NR   | LCM(initial dose:2.9mg/kg/d(0.8-5.9mg/kg/d); maximum dose:6.9mg/kg/d(1.7-14.3mg/kg/d); gradually increased)                                                                                     | / | 19(3-43.3) | 28.6% | 4.8% | NR |
| Vossler 2016  | Case series | 40.7 ±13.3(16-69)  | 322(161) | White: 80.1% | US; Canada; Europe; Australia | Focal-onset seizures                                                         | 16.40±13.56 | NR   | LCM(median dose:500mg/d(150-800 mg/d))                                                                                                                                                          | / | 24         | 91.0% | 6.8% | NR |
| Geffrey 2015  | Case series | 20±10(1-54)        | 46(21)   | NR           | US                            | Refractory epilepsies                                                        | 12          | NR   | LCM(Mean dose:7±3mg/kg/d; In children:po 1.42-15.69mg/kg/d; In adults:po 2.09-8.90mg/kg/d)                                                                                                      | / | 20±20      | 32.6% | NR   | NR |
| Ijff 2015     | Case series | 37.0±14.5(16-74)   | 32(9)    | NR           | Netherlands                   | Refractory epilepsy                                                          | NR          | NR   | LCM(initial dose:50mg/d; maximum doseL400mg/d; increased 50mg/d per week)                                                                                                                       | / | 7±6(1-24)  | 9.1%  | 9.1% | NR |
| Lattanzi 2015 | Case series | 40.5(28-47)        | 58(26)   | Caucasian    | NR                            | Focal-onset seizures                                                         | NR          | ILAE | LCM(maintenance dose:400mg/d)                                                                                                                                                                   | / | 12         | 20.7% | NR   | 0  |

|                 |             |                  |          |                            |                                                                  |                                                                                                          |               |      |                                                                                                                                            |   |                |       |       |       |
|-----------------|-------------|------------------|----------|----------------------------|------------------------------------------------------------------|----------------------------------------------------------------------------------------------------------|---------------|------|--------------------------------------------------------------------------------------------------------------------------------------------|---|----------------|-------|-------|-------|
| René 2015       | Case series | 27.1±14.2(18-61) | 19(12)   | NR                         | Colombia                                                         | Atonic; Tonic; Tonic-clonic seizures                                                                     | 22.5(5-59)    | ILAE | LCM(initial dose:25-50mg/d(median 25mg/d); maximum dose:200mg/d;gradually increased every 2 weeks)                                         | / | 18             | 47.4% | NR    | NR    |
| Runge 2015      | Case series | 47.3±17.0        | 571(283) | NR                         | Germany                                                          | Focal-onset seizures                                                                                     | 8.0 (0–64)    | NR   | LCM(mean±SD dose: 279.2±101.3mg/d)                                                                                                         | / | 6              | 48.5% | 10.7% | 9.80% |
| Garcés 2014     | Case series | 59.8(18–91)      | 98(42)   | NR                         | Spain                                                            | NCSE/CPS:56(57.1 %); CSE(motor SPS)/motor SPS:17(17.3%)                                                  | 18.0±17.6     | ILAE | SE:LCM(mean loading dose:190.9mg/d; mean maintenance dose:217.7mg/d) ARS:LCM(mean loading dose:187.2mg/d; mean maintenance dose:202.3mg/d) | / | NR             | 15.6% | NR    | NR    |
| Grosso 2014*    | Case series | 2.7±1.1(1.9-3.9) | 24(14)   | NR                         | Italy                                                            | Refractory focal epilepsy                                                                                | NR            | ILAE | LCM(initial dose:1-2mg/kg/d; max dose:7-15.5mg/kg/d; gradually increased)                                                                  | / | 3              | 33.3% | NR    | 0     |
| Kim 2014*       | Case series | 13.9(1.2-17.9)   | 21(16)   | NR                         | Koera                                                            | Refractory focal epilepsy                                                                                | 4.1(1.0-14.4) | NR   | LCM(mean maintenance dose:5.4mg/kg/d(1.4-9.8mg/kg/d))                                                                                      | / | 10.1(6.1–13.0) | 38.1% | 10.0% | NR    |
| Stephen 2014    | Case series | 42(14-71)        | 160(74)  | NR                         | UK                                                               | Focal-onset seizures                                                                                     | NR            | NR   | LCM(initial dose:50mg/d; maximum dose:200-400md/d; gradually increased)                                                                    | / | 24             | NR    | 15.0% | NR    |
| Villanueva 2014 | Case series | 44.9(16-88)      | 199(104) | NR                         | Switzerland                                                      | Frontal 45 (22.7%); Temporal 98 (49.5%); Parietal 12 (6.1%); Occipital 9 (4.5%); Lobe unknown 34 (17.2%) | NR            | NR   | LCM(mean±SD dose:291±103.6mg/d(median 300mg/d))                                                                                            | / | 12             | NR    | 8.3%  | NR    |
| William 2014    | Case series | 40.8±11.01       | 370(178) | Whith; Black; Asian; Other | Germany; Hungary; Lithuania; Poland; Sweden; Switzerland; UK; US | Focal-onset seizures                                                                                     | 25.3±12.55    | NR   | LCM(100mg/d:2.2%; 200mg/d:11.6%; 300mg/d:15.4%; 400mg/d:22.2%; 500mg/d:15.9%; 600mg/d:21.9%; >600mg/d:10.8%)                               | / | 12             | 33.8% | 13.2% | NR    |

|                 |             |                   |          |           |         |                                                                                                            |            |      |                                                                                                                                      |   |              |       |       |       |
|-----------------|-------------|-------------------|----------|-----------|---------|------------------------------------------------------------------------------------------------------------|------------|------|--------------------------------------------------------------------------------------------------------------------------------------|---|--------------|-------|-------|-------|
| Giorgi 2013     | Case series | 48.2±14.8(26-76)  | 10(6)    | NR        | Italy   | Focal limbic seizures, SG; Nocturnal frontal seizures                                                      | NR         | ILAE | LCM(initial dose:100mg/d; maximum dose:250±81.6mg/d; weekly increments of 50 mg/d)                                                   | / | NR           | 60.0% | 0     | NR    |
| Li 2013         | Case series | 40.2 ± 10.9       | 17(7)    | Caucasian | Germany | Pharmacoresistant focal epilepsy                                                                           | 19         | NR   | LCM(iv.,200mg,q12h,2-3d; then po,200mg,q12h,2-3d)                                                                                    | / | 3            | 17.6% | NR    | NR    |
| Villanueva 2013 | Case series | 42.4(18-88)       | 500(268) | NR        | Spain   | Focal-onset seizures                                                                                       | 1.79±1.19  | ILAE | LCM(mean±SD dose:338.5±96.3mg/d; median dose:400mg/d)                                                                                | / | 12           | NR    | 9.0%  | NR    |
| Carlos 2012*    | Case series | 8.01-4.25(0.5-16) | 130(72)  | NR        | Spain   | Simple:32(24.6%); Complex:93(71.5%); Secondly generalized:84(64.6%)                                        | NR         | ILAE | LCM(initial dose:1-2mg/kg/day; maximum dose:6-9mg/kg/day; gradually uptitrated)                                                      | / | 12           | 30.0% | 2.3%  | NR    |
| Eli 2012*       | Case series | 8±4.7(1.5-16)     | 17(10)   | NR        | Israel  | Dyscognitive:17; Evolving to a bilateral convulsive:3; Tonic:4; Tonic Atonic:1; Generalized tonic-clonic:2 | 5.4±3.3    | NR   | LCM(initial dose:1.4-5mg/kg/d(average:3.04±1.09mg/kg/d); maximum dose:6.7-20mg/kg/d(average:12.39±4.48mg/kg/d); gradually increased) | / | 9.1±4.4      | 58.8% | NR    | NR    |
| Flores 2012     | Case series | 41.9(17-82)       | 285(148) | NR        | UK      | Tonic clonic seizures:107; Complex partial seizures:221; Simple partial seizures:34                        | NR         | NR   | Initial dose: po,25-200mg qd; most frequent dose:50mg/d; mean maximum dose:po,279.4(25-700) mg qd; orally                            | / | 11.6(0.1-42) | 47.9% | 20.8% | NR    |
| Harden 2012     | Case series | 38(18-82)         | 67(32)   | NR        | US      | Complex partial:61(91%); Generalized tonic clonic:24(36%); Atonic:11(16%)                                  | 22         | NR   | LCM(mean dose:278mg/d(50-600mg/d))                                                                                                   | / | 7(1-12)      | 55.2% | 7.5%  | 0     |
| Husain 2012     | Case series | 38.2±12.46        | 308(162) | NR        | US      | Focal-onset seizures                                                                                       | 23.8±12.97 | NR   | LCM(mean dose:200mg/d(100-800 mg/d); increased 100mg/d a week)                                                                       | / | 12           | 93.5% | 11.4% | 23.1% |

|                     |             |                   |         |       |           |                                                                                                                                                                                  |            |      |                                                                                                                                           |   |               |       |       |    |
|---------------------|-------------|-------------------|---------|-------|-----------|----------------------------------------------------------------------------------------------------------------------------------------------------------------------------------|------------|------|-------------------------------------------------------------------------------------------------------------------------------------------|---|---------------|-------|-------|----|
| Kamel 2012          | Case series | 18–72             | 128(64) | NR    | Australia | Focal-onset seizures                                                                                                                                                             | NR         | NR   | LCM(initial dose:100mg/d; mean dose:250mg/d)                                                                                              | / | 18            | 40.6% | 19.0% | NR |
| Song 2012*          | Case series | 8±4.7(1.5-16)     | 17(10)  | Asian | China     | Partial epileptic seizure:12; Partial seizures secondary to generalized seizure:3; Generalized epileptic seizure:2                                                               | 5.4±3.3    | NR   | LCM(initial dose:1.4-5mg/kg bid(average:3.04±1.09 mg/kg/d); maximum dose:6.7-20mg/kg qd(average:12.39±4.48 mg/kg/d); gradually increased) | / | 9.1±4.4(1-18) | 58.8% | 11.8% | NR |
| Yorns 2012          | Case series | 13.1±4.9(<21)     | 40(22)  | NR    | US        | Generalized tonic clonic:36(88%); Atonic:12(30%); Tonic:11(27.5%); Myoclonic:10(25%); Simple partial:6(15%); Complex partial:30(75%); Absence:15(37.5%); Multiple types:28(70%). | NR         | NR   | LCM(initial dose:2.0±0.7mg/kg/d. maximum dose:7.0±4.2mg/kg/d; gradually increase)                                                         | / | 9.2±4.7       | 37.5% | 7.5%  | NR |
| García-Morales 2011 | Case series | 38.3(21–69)       | 60(28)  | NR    | Spain     | Refractory focal epilepsy, nocturnal seizures                                                                                                                                    | 27.2(1-67) | ILAE | LCM(initial dose:50mg/d; maximum dose:200-500mg/d; weekly increments of 50mg/d)                                                           | / | 13-24         | 33.3% | 10.0% | 0  |
| Gavatha 2011*       | Case series | 10.58±7.58(3-18 ) | 18(10)  | NR    | Greece    | Focal-onset seizures                                                                                                                                                             | NR         | NR   | LCM(initial dose:1mg/kg/d; maximum dose:6.34mg/kg/d(1.7-10mg/kg/d);increased 1mg/kg/week)                                                 | / | 12            | 38.9% | 5.6%  | NR |
| Giorgi 2011         | Case series | 48.2±14.8(26-76)  | 10(6)   | NR    | Italy     | Focal symptomatic epilepsy:5; Probably focal symptomatic epilepsy:5                                                                                                              | 13.5±7.9   | ILAE | LCM(initial dose:50mg/d; maximum dose:250±81.6mg/d; gradually increased)                                                                  | / | 6             | 60.0% | 0     | 0  |
| Guilhot 2011        | Case series | 14.9±3.3(8–21)    | 16(7)   | NR    | Brazil    | Drug-resistant focal epilepsy                                                                                                                                                    | NR         | ILAE | LCM(initial dose:50mg/d(71.8±25.6 mg/d); maximum dose:275mg/d(262.5±158.6mg/d); gradually increased)                                      | / | 4(1-13)       | NR    | 25.0% | NR |

|                  |             |            |        |    |         |                                                                       |    |      |                                                                                                            |   |            |      |       |    |
|------------------|-------------|------------|--------|----|---------|-----------------------------------------------------------------------|----|------|------------------------------------------------------------------------------------------------------------|---|------------|------|-------|----|
| Julia 2011       | Case series | 62(17-95)  | 48(22) | NR | Austria | Seizure cluster:17;<br>Status epilepticus:31                          | NR | NR   | LCM(initial dose:200mg/d(200-400 mg/d),i.v.; loading dose:0(0-400mg),iv)                                   | / | NR         | 4.2% | NR    | NR |
| Maschio 2011     | Case series | 22-63      | 14(8)  | NR | Italy   | Brain tumor-related epilepsy                                          | NR | ILAE | LCM(initial dose:100mg/d; maximum dose:400mg/d; gradually increased; mean dose:332.1mg/day(100-400mg/day)) | / | 5.4(<1-10) | NR   | 7.14% | NR |
| Kellinghaus 2010 | Case series | 62.64±19.7 | 39(18) | NR | Germany | Generalized convulsive:6;<br>Complex partial:17;<br>Simple partial:16 | NR | NR   | LCM (median dose:400mg/d(200-400 mg/d))                                                                    | / | NR         | NR   | NR    | 0  |
| Stamm B 2020     | Case report | 32         | 1(1)   | NR | NR      | Drug-resistant epilepsy with focal impaired awareness seizures        | NR | NR   | LCM(400mg/d i.v.)                                                                                          | / | NR         | NR   | NR    | NR |
| Lachuer 2012     | Case report | 88         | 1(0)   | NR | France  | Epileptic syndrome                                                    | NR | NR   | LCM(100mg/d i.v.)                                                                                          | / | NR         | NR   | NR    | NR |
| Krause 2011      | Case report | 89         | 1(0)   | NR | Germany | Nonconvulsive status epilepticus                                      | NR | NR   | LCM(400mg i.v. 2 times within 6 hours)                                                                     | / | NR         | NR   | NR    | NR |

LCM: Lacosamide; TPM: Topiramate; ZNS:Zonisamide; LEV:Levetiracetam; PGB:pregabalin; PER: Perampanel; CBZ: Carbamazepine.

RCT: Randomized clinical trial.

NR: Not reported.

Study\*: Studies which only included children under the age of 18.

**Supplementary table 2 Quality evaluation of includes studies**

| RCT(n=11) |           |          |           | Cohort study(n=16) |           | Case series(n=54) |           | Case report(n=3) |          |
|-----------|-----------|----------|-----------|--------------------|-----------|-------------------|-----------|------------------|----------|
| Cochrane  | high risk | low risk | unclear   | NOS                |           | NICE              |           | CARE             |          |
| Item 1    | 0(0%)     | 4(36.4%) | 7(63.6%)  | selection          |           | Item 1            | 12(22.2%) | Item 1           | 3(100%)  |
| Item 2    | 1(9.1%)   | 3(27.3%) | 7(63.6%)  | Item 1             | 14(87.5%) | Item 2            | 53(98.1%) | Item 2           | 3(100%)  |
| Item 3    | 1(9.1%)   | 3(27.3%) | 7(63.6%)  | Item 2             | 14(87.5%) | Item 3            | 46(85.2%) | Item 3           | 3(100%)  |
| Item 4    | 2(18.2%)  | 3(27.3%) | 6(54.5%)  | Item 3             | 8(50%)    | Item 4            | 43(79.6%) | Item 4           | 3(100%)  |
| Item 5    | 1(9.1%)   | 9(81.8%) | 1(9.1%)   | Item 4             | 16(100%)  | Item 5            | 45(83.3%) | Item 5           | 2(66.7%) |
| Item 6    | 0(0%)     | 9(81.8%) | 2(18.2%)  | comparability      |           | Item 6            | 39(72.2%) | Item 6           | 3(100%)  |
| Item 7    | 0(0%)     | 1(9.1%)  | 10(90.1%) | Item 1             | 16(100%)  | Item 7            | 49(90.7%) | Item 7           | 3(100%)  |
|           |           |          |           | Item 2             | 7(43.8%)  | Item 8            | 6(11.1%)  | Item 8           | 2(66.7%) |
|           |           |          |           | outcome            |           | mean score        | 5.4       | Item 9           | 3(100%)  |
|           |           |          |           | Item 1             | 6(37.5%)  |                   |           | Item 10          | 2(66.7%) |
|           |           |          |           | Item 2             | 12(75%)   |                   |           | Item 11          | 3(100%)  |
|           |           |          |           | Item 3             | 9(56.3%)  |                   |           | Item 12          | 1(33.3%) |
|           |           |          |           | mean score         | 6.3       |                   |           | Item 13          | 1(33.3%) |

Yes=1, No=0.

RCTs: item 1 Random sequence generation; item 2 Allocation concealment; item 3 Blinding of participants; item 4 Blinding of outcome assessment; item 5 Incomplete outcome data; item 6 Selective reporting; item 7 Other sources of bias.

Cohort study: selection: item 1 Representativeness of the exposed cohort; item 2 Selection of the non exposed cohort; item 3 Ascertainment of exposure; item 4 Demonstration that outcome of interest was not present at start of study; Comparability: item 1 Study controls for the most important factor; item 2 Study controls for any additional factor; Outcome: item 2 Assessment of outcome; item 2 Was follow-up long enough for outcomes to occur; item 3 Adequacy of follow up of cohorts.

Case series: item 1 Case series in more than one center, that is, multicenter study; item 2 Is the hypothesis/aim/objective of the study clearly described? item 3 Are the inclusion and exclusion criteria (case definition) clearly reported? item 4 Is there a clear definition of the outcomes reported? item 5 Were data collected prospectively? item 6 Is there an explicit statement that patients were recruited consecutively? item 7 Are the main findings of the study clearly described? item 8 Are outcomes stratified? (e.g., by disease stage, abnormal test results, patient characteristics).

Case reports: item1 Title; item2 Key words; item3 Abstract; item4 Introduction; item5 Information of patient; item6 Clinical findings; item7

Timeline description; item8 Diagnostic evaluation; item9 Treatment and intervention; item10 Follow-up and outcomes; item11 Discussion; item12 Patient's view; item13 Informed Consent.
